# Supplementary material for: Preparation of mitochondria to measure superoxide flashes in angiosperm flowers
Source: PeerJ. 2019 Apr 11;7:e6708. doi: 10.7717/peerj.6708 (PMC6462395; doi:10.7717/peerj.6708)
Supplement: Data S1 [file peerj-07-6708-s003.xlsx]

## Sheet: stigma
state	state 3 nmol O/min*mg	state 4 nmol O/min*mg
	296.71	65.61	4.52233
	279.39	58.73	4.75719
	268.53	60.76	4.41952
	247.86	53.22	4.65727
	226.32	53.8	4.20669
	299.28	68.35	4.37864
average	269.682	60.0783	4.49027
SE	28.4907	6.12791	0.199022

## Sheet: petal 1
state	state 3 nmol O/min*mg	state 4 nmol O/min*mg
	227.6	55.13	4.12842
	299.01	69.92	4.27646
	245.51	53.81	4.56253
	298.12	71.7	4.15788
	299.74	68.89	4.35099
	286.37	67.3	4.25513
average	276.058	64.4583	4.28857
SE	31.5026	7.87897	0.156809

## Sheet: rec
state	state 3 nmol O/min*mg	state 4 nmol O/min*mg
	227.792	53.9385	4.22319
	270.718	62.9	4.30395
	295	63.3	4.66035
	243.35	57.7805	4.21162
	296.1	73.4	4.03406
	213.443	48.6857	4.3841
average	257.734	60.0008	4.30288
SE	34.9125	8.58535	0.210392

## Sheet: petal 2
state	state 3 nmol O/min*mg	state 4 nmol O/min*mg	RCR
	249.433	59.3333	4.20393
	297.15	75	3.962
	266.482	66.4727	4.00889
	212.264	49.3571	4.30058
	295.3	63.91	4.62056
	234.238	57.8492	4.04912
average	259.145	61.9871	4.19085
SE	33.8168	8.68141	0.24594

## Sheet: method A
state	state 3 nmol O/min*mg	state 4 nmol O/min*mg	RCR
	227.823	58.7231	3.87962
	271.918	71.0818	3.82543
	295.2	72.18	4.08978
	198.12	53.1533	3.72733
	245.283	62.9167	3.89854
	225.077	53.3	4.22283
average	243.904	61.8925	3.94059
SE	35.0063	8.3854	0.182288

## Sheet: RCR
stigma	petal 1	rec	petal 2	method A
4.52233	4.12842	4.22319	4.20393	3.87962
4.75719	4.27646	4.30395	3.962	3.82543
4.41952	4.56253	4.66035	4.00889	4.08978
4.65727	4.15788	4.21162	4.30058	3.72733
4.20669	4.35099	4.03406	4.62056	3.89854
4.37864	4.25513	4.3841	4.04912	4.22283

## Sheet: final
groups	state 3 nmol O/min*mg	state 4 nmol O/min*mg	RCR
stigma	269.68±28.49	60.08±6.13	4.49±0.20
petal 1	276.06±31.50	64.46±7.88	4.29±0.16
rec	257.73±34.91	60.00±8.59	4.30±0.21
petal 2	259.14±33.82	61.99±8.68	4.19±0.25
method A	243.90±35.01	61.89±8.39	3.94±0.18
