# Supplementary material for: Preparation of mitochondria to measure superoxide flashes in angiosperm flowers
Source: PeerJ. 2019 Apr 11;7:e6708. doi: 10.7717/peerj.6708 (PMC6462395; doi:10.7717/peerj.6708)
Supplement: Data S2 [file peerj-07-6708-s004.xlsx]

## Sheet: petal
	Y
	26.8378
	27.5524
	32.7843
	27.9381
	30.2083
	41.9082
	31.6292
	28.9878
	30.1852
	40.225
	31.2838
	39.2632
	28.32
	39.3125
	28.3115
	35.0159
	31.5965
	26.8036
	28.4364
	28.4528
	30.0755
	41.7692
	30.9811
	39.9623
	36.2353
	37.2885
	36.4
	38.0408
	42.4694
	33.7347
	33.5652
	43.8571
	34
	29.551
	36.0652
	31.5455
	28.3409
	28.9535
	36.8636
	28.5116
	30.0476
	26.7
	26.2308
	31
	25.7692
	43.9189
	31.2105
	27.025
	27.8649
	25.0811
	38.7778
	38.8286
	35.7429
	30.3235
	40.0571
	26.1765
	40
	38.7353
	31.3235
	35
	39.1765
	31.6765
	40.8182
	41.9091
	26.8485
	35.1875
	37.8125
	31.0938
	30.4375
	41.0968
	39.5484
	41.0968
	27.8387
	28.0645
	41.5484
	42.0333
	40.2
	32.4828
	24.931
	32
	30.4483
	30.7931
	35.8571
	31.5714
	26.9286
	32.0357
	27.3571
	35
	34.25
	32.037
	37.4815
	31.4074
	29.7778
	26.9259
	34.9259
	27
	33.6538
	27.5385
	34.12
	29.08
average	33.1707
SE	5.17431

## Sheet: style
	Y
	72.6681
	77.7005
	48.9427
	60.1966
	67.0663
	59.1543
	58.5886
	80.321
	70.8951
	51.2189
	68.0592
	69.1753
	64.3197
	71.6118
	65.4897
	64.9795
	83.0845
	52.7655
	83.7518
	66.5347
	49.3427
	57.9275
	74
	69.1314
	56.6222
	46.3511
	65.6555
	50.4
	80.1833
	48.1301
	57.6387
	55.8644
	47.5083
	78.1367
	69.8087
	58.6529
	59.9565
	56.4583
	62.5776
	59.3274
	47.2613
	49.6789
	70.1441
	69.1053
	52.1296
	52.6422
	45.8173
	52.7864
	46.6574
	77.2404
	65.48
	73.0294
	63.76
	55.6327
	69.7129
	82.1553
	69.419
	69.2647
	49.47
	72.6162
	63.6634
	62.1633
	50.8438
	81.0722
	68.4592
	67.8064
	75.3684
	59.1443
	78.8936
	76.1616
	60.0632
	X
	75.6413
	64.9167
	46.1753
	55.2967
	51.7865
	50.1875
	54.6105
	47.4731
	60.1236
	56.9111
	56.9667
	56.0341
	48.686
	62.6067
	64.75
	59.1905
	70.069
	54.7619
	61.314
	75.631
	68.9643
	48
	46.9398
	52.2674
	49.5679
	68.7
	55.7848
	49.2073
	66.6456
average	61.9705
SE	10.3591

## Sheet: final
X	Y
petal	26.8378
petal	27.5524
petal	32.7843
petal	27.9381
petal	30.2083
petal	41.9082
petal	31.6292
petal	28.9878
petal	30.1852
petal	40.225
petal	31.2838
petal	39.2632
petal	28.32
petal	39.3125
petal	28.3115
petal	35.0159
petal	31.5965
petal	26.8036
petal	28.4364
petal	28.4528
petal	30.0755
petal	41.7692
petal	30.9811
petal	39.9623
petal	36.2353
petal	37.2885
petal	36.4
petal	38.0408
petal	42.4694
petal	33.7347
petal	33.5652
petal	43.8571
petal	34
petal	29.551
petal	36.0652
petal	31.5455
petal	28.3409
petal	28.9535
petal	36.8636
petal	28.5116
petal	30.0476
petal	26.7
petal	26.2308
petal	31
petal	25.7692
petal	43.9189
petal	31.2105
petal	27.025
petal	27.8649
petal	25.0811
petal	38.7778
petal	38.8286
petal	35.7429
petal	30.3235
petal	40.0571
petal	26.1765
petal	40
petal	38.7353
petal	31.3235
petal	35
petal	39.1765
petal	31.6765
petal	40.8182
petal	41.9091
petal	26.8485
petal	35.1875
petal	37.8125
petal	31.0938
petal	30.4375
petal	41.0968
petal	39.5484
petal	41.0968
petal	27.8387
petal	28.0645
petal	41.5484
petal	42.0333
petal	40.2
petal	32.4828
petal	24.931
petal	32
petal	30.4483
petal	30.7931
petal	35.8571
petal	31.5714
petal	26.9286
petal	32.0357
petal	27.3571
petal	35
petal	34.25
petal	32.037
petal	37.4815
petal	31.4074
petal	29.7778
petal	26.9259
petal	34.9259
petal	27
petal	33.6538
petal	27.5385
petal	34.12
petal	29.08
style	72.6681
style	77.7005
style	48.9427
style	60.1966
style	67.0663
style	59.1543
style	58.5886
style	80.321
style	70.8951
style	51.2189
style	68.0592
style	69.1753
style	64.3197
style	71.6118
style	65.4897
style	64.9795
style	83.0845
style	52.7655
style	83.7518
style	66.5347
style	49.3427
style	57.9275
style	74
style	69.1314
style	56.6222
style	46.3511
style	65.6555
style	50.4
style	80.1833
style	48.1301
style	57.6387
style	55.8644
style	47.5083
style	78.1367
style	69.8087
style	58.6529
style	59.9565
style	56.4583
style	62.5776
style	59.3274
style	47.2613
style	49.6789
style	70.1441
style	69.1053
style	52.1296
style	52.6422
style	45.8173
style	52.7864
style	46.6574
style	77.2404
style	65.48
style	73.0294
style	63.76
style	55.6327
style	69.7129
style	82.1553
style	69.419
style	69.2647
style	49.47
style	72.6162
style	63.6634
style	62.1633
style	50.8438
style	81.0722
style	68.4592
style	67.8064
style	75.3684
style	59.1443
style	78.8936
style	76.1616
style	60.0632
style	X
style	75.6413
style	64.9167
style	46.1753
style	55.2967
style	51.7865
style	50.1875
style	54.6105
style	47.4731
style	60.1236
style	56.9111
style	56.9667
style	56.0341
style	48.686
style	62.6067
style	64.75
style	59.1905
style	70.069
style	54.7619
style	61.314
style	75.631
style	68.9643
style	48
style	46.9398
style	52.2674
style	49.5679
style	68.7
style	55.7848
style	49.2073
style	66.6456
