# Supplementary material for: Preparation of mitochondria to measure superoxide flashes in angiosperm flowers
Source: PeerJ. 2019 Apr 11;7:e6708. doi: 10.7717/peerj.6708 (PMC6462395; doi:10.7717/peerj.6708)
Supplement: Data S3 [file peerj-07-6708-s005.xlsx]

## Sheet: petal
	Y
	20.2
	30.05
	26.83
	17.92
	35.71
	25.75
	22.61
	19.04
	22.1
	26.76
	30.32
	27.75
	30.25
	20.83
	18.88
	34.5
	23.89
	21.33
	23
	23.4
	18.42
	18.42
	25.95
	18.73
	25.44
	19.89
	26.6
	30.13
	20.63
	23.33
	30.67
	26
	27.28
	22.06
	31.08
	18.67
	27.33
	30.15
	20
	27.64
	21
	24.8
	18.06
	20.4
	30.2
	30.55
	34
	27.73
	20.3
	23.83
	26.67
	51.8
	29.13
	31.92
	22.25
	25.72
	37.03
	24.33
	30.8
	33.11
	35.44
	35.83
	19.75
	23.92
	25.63
	25.56
	33.55
	32.08
	23.53
	34.78
	52.11
	29.75
	24.3
	23.36
	28.48
	29.07
	33.59
	31.93
	33.4
	29.97
	32.87
	30.38
	20.38
	24.5
	28.8
	21.05
	26.44
	30.17
	36.27
	20.29
	18.69
	26.17
	30
	23.62
	32.75
	32.13
	28.21
	20.67
	27.63
	30.13
average	27.0035
SE	6.21905

## Sheet: receptacle
	Y
	73.15
	56.1
	26.22
	58.72
	50.29
	26.5
	29.73
	60.59
	45.58
	24.42
	27.93
	30.65
	27.02
	32.75
	34
	58.55
	39.44
	63.15
	66.1
	33.22
	58.72
	50.29
	26.5
	29.73
	65.02
	33
	37.21
	36.67
	70.11
	89.05
	59.56
	35.25
	60.89
	56.19
	43
	51.87
	63.7
	47.25
	43.45
	55.02
	81.47
	69.73
	63.5
	62.57
	36.45
	63.44
	70.35
	46.46
	49.75
	28.57
	55.96
	62.67
	56.33
	35.92
	51.75
	36.89
	33.64
	70.1
	54.62
	56.14
	48.89
	65.57
	50.43
	61.33
	59.74
	48.08
	36.77
	69.18
	32.25
	58.78
	57.61
	43.92
	23.67
	39.1
	60.71
	56.31
	28.56
	55.64
	26.17
	38.6
	78.75
	47.52
	38.02
	58.13
	54.73
	40.7
	30.67
	35.25
	34.88
	21.2
	55.75
	30.87
	46.13
	30.87
	31.08
	43.92
	45.32
	28.75
	45.78
	41.9
average	47.6443
SE	15.0271

## Sheet: final
X	Y
petal	20.2
petal	30.05
petal	26.83
petal	17.92
petal	35.71
petal	25.75
petal	22.61
petal	19.04
petal	22.1
petal	26.76
petal	30.32
petal	27.75
petal	30.25
petal	20.83
petal	18.88
petal	34.5
petal	23.89
petal	21.33
petal	23
petal	23.4
petal	18.42
petal	18.42
petal	25.95
petal	18.73
petal	25.44
petal	19.89
petal	26.6
petal	30.13
petal	20.63
petal	23.33
petal	30.67
petal	26
petal	27.28
petal	22.06
petal	31.08
petal	18.67
petal	27.33
petal	30.15
petal	20
petal	27.64
petal	21
petal	24.8
petal	18.06
petal	20.4
petal	30.2
petal	30.55
petal	34
petal	27.73
petal	20.3
petal	23.83
petal	26.67
petal	51.8
petal	29.13
petal	31.92
petal	22.25
petal	25.72
petal	37.03
petal	24.33
petal	30.8
petal	33.11
petal	35.44
petal	35.83
petal	19.75
petal	23.92
petal	25.63
petal	25.56
petal	33.55
petal	32.08
petal	23.53
petal	34.78
petal	52.11
petal	29.75
petal	24.3
petal	23.36
petal	28.48
petal	29.07
petal	33.59
petal	31.93
petal	33.4
petal	29.97
petal	32.87
petal	30.38
petal	20.38
petal	24.5
petal	28.8
petal	21.05
petal	26.44
petal	30.17
petal	36.27
petal	20.29
petal	18.69
petal	26.17
petal	30
petal	23.62
petal	32.75
petal	32.13
petal	28.21
petal	20.67
petal	27.63
petal	30.13
petal	34.56
receptacle	73.15
receptacle	56.1
receptacle	26.22
receptacle	58.72
receptacle	50.29
receptacle	26.5
receptacle	29.73
receptacle	60.59
receptacle	45.58
receptacle	24.42
receptacle	27.93
receptacle	30.65
receptacle	27.02
receptacle	32.75
receptacle	34
receptacle	58.55
receptacle	39.44
receptacle	63.15
receptacle	66.1
receptacle	33.22
receptacle	58.72
receptacle	50.29
receptacle	26.5
receptacle	29.73
receptacle	65.02
receptacle	33
receptacle	37.21
receptacle	36.67
receptacle	70.11
receptacle	89.05
receptacle	59.56
receptacle	35.25
receptacle	60.89
receptacle	56.19
receptacle	43
receptacle	51.87
receptacle	63.7
receptacle	47.25
receptacle	43.45
receptacle	55.02
receptacle	81.47
receptacle	69.73
receptacle	63.5
receptacle	62.57
receptacle	36.45
receptacle	63.44
receptacle	70.35
receptacle	46.46
receptacle	49.75
receptacle	28.57
receptacle	55.96
receptacle	62.67
receptacle	56.33
receptacle	35.92
receptacle	51.75
receptacle	36.89
receptacle	33.64
receptacle	70.1
receptacle	54.62
receptacle	56.14
receptacle	48.89
receptacle	65.57
receptacle	50.43
receptacle	61.33
receptacle	59.74
receptacle	48.08
receptacle	36.77
receptacle	69.18
receptacle	32.25
receptacle	58.78
receptacle	57.61
receptacle	43.92
receptacle	23.67
receptacle	39.1
receptacle	60.71
receptacle	56.31
receptacle	28.56
receptacle	55.64
receptacle	26.17
receptacle	38.6
receptacle	78.75
receptacle	47.52
receptacle	38.02
receptacle	58.13
receptacle	54.73
receptacle	40.7
receptacle	30.67
receptacle	35.25
receptacle	34.88
receptacle	21.2
receptacle	55.75
receptacle	30.87
receptacle	46.13
receptacle	30.87
receptacle	31.08
receptacle	43.92
receptacle	45.32
receptacle	28.75
receptacle	45.78
receptacle	41.9
