# Supplementary material for: Preparation of mitochondria to measure superoxide flashes in angiosperm flowers
Source: PeerJ. 2019 Apr 11;7:e6708. doi: 10.7717/peerj.6708 (PMC6462395; doi:10.7717/peerj.6708)
Supplement: Data S4 [file peerj-07-6708-s006.xlsx]

## Sheet: petal
Y
66.0607
81.4289
63.15
81.4063
85.7828
97.4655
69.0893
73.8171
73.7052
63.7603
71.826
75.2266	average
10.4763	SE

## Sheet: style
Y
132.441
153.364
103.912
127.692
148.917
129.885
124.128
103.928
130.223
172.349
116.013
106.304
130.219
129.183	average
20.1077	SE

## Sheet: final
X	Y
petal	66.0607
petal	81.4289
petal	63.15
petal	81.4063
petal	85.7828
petal	97.4655
petal	69.0893
petal	73.8171
petal	73.7052
petal	63.7603
petal	71.826
style	132.441
style	153.364
style	103.912
style	127.692
style	148.917
style	129.885
style	124.128
style	103.928
style	130.223
style	172.349
style	116.013
style	106.304
style	130.219
