# Supplementary material for: Preparation of mitochondria to measure superoxide flashes in angiosperm flowers
Source: PeerJ. 2019 Apr 11;7:e6708. doi: 10.7717/peerj.6708 (PMC6462395; doi:10.7717/peerj.6708)
Supplement: Data S5 [file peerj-07-6708-s007.xlsx]

## Sheet: rec
Y
47.3104
30.5092
38.2153
63.2711
51.0135
44.005
46.0045
63.9209
52.5293
45.61
48.2389	average
10.2388	SE

## Sheet: petal
Y
34.5885
18.6109
25.7061
20.1459
27.7367
21.729
26.33
28.56
23.82
29.53
25.6757	average
4.79352	SE

## Sheet: final
X	Y
petal	34.5885
petal	18.6109
petal	25.7061
petal	20.1459
petal	27.7367
petal	21.729
petal	26.33
petal	28.56
petal	23.82
petal	29.53
receptacle	47.3104
receptacle	30.5092
receptacle	38.2153
receptacle	63.2711
receptacle	51.0135
receptacle	44.005
receptacle	46.0045
receptacle	63.9209
receptacle	52.5293
receptacle	45.61
