# Supplementary material for: Preparation of mitochondria to measure superoxide flashes in angiosperm flowers
Source: PeerJ. 2019 Apr 11;7:e6708. doi: 10.7717/peerj.6708 (PMC6462395; doi:10.7717/peerj.6708)
Supplement: Data S8 [file peerj-07-6708-s010.xlsx]

## Sheet: rec
Y
106.326
98.2704
98.9511
112.013
105.664
119.66
122.88
155.448
145.18
115.53
117.992	average
19.0036	SE

## Sheet: petal
Y
43.109
63.7877
31.2042
63.1273
43.3934
59.0092
57.3636
60
49.0509
49.36
51.9405	average
10.5719	SE

## Sheet: final
X	Y
petal	43.109
petal	63.7877
petal	31.2042
petal	63.1273
petal	43.3934
petal	59.0092
petal	57.3636
petal	60
petal	49.0509
petal	49.36
receptacle	106.326
receptacle	98.2704
receptacle	98.9511
receptacle	112.013
receptacle	105.664
receptacle	119.66
receptacle	122.88
receptacle	155.448
receptacle	145.18
receptacle	115.53
